# Supplementary material for: Self-assembled microspheres from f-block elements and nucleoamphiphiles
Source: Royal Society of Chemistry journal article supplement (doi:10.1039/b601038e), 2006-01-01
Supplement: b601038e.pdf [file b601038e.pdf]

## Self-Assembled Microspheres From f-Block Elements and Nucleoamphiphiles

Louis Moreau,<sup>a</sup> Fabio Ziarelli,<sup>b</sup> Mark W. Grinstaff<sup>c</sup> and Philippe Barthélémy,<sup>a\*</sup>

<sup>a</sup> Université Victor Segalen Bordeaux 2, 146 rue Léo Saignat 33076 Bordeaux Cedex, France.

E-mail : [barthelemy@bordeaux.inserm.fr](mailto:barthelemy@bordeaux.inserm.fr); Fax: 33 5 57 57 10 15; Fax: 33 5 57 57 10 14

<sup>b</sup> Spectropole, Universités Aix-Marseille, Centre de Saint Jérôme, Av. Escadrille Normandie – Niemen, F- 13397, Marseille Cedex 20, France.

<sup>c</sup> Departments of Chemistry, Biomedical Engineering, Metcalf Center for Science and Engineering, Boston University, Boston MA 02215, USA.

### Supporting data Materials:

TEM microscopy experiments were performed on a Philips CM 10 and a Jeol JEM-3010 (CRMC2, Luminy, Marseille, France) for High Resolution pictures (Cu/Pd carbon coated grids). SEM secondary electron microscopy experiments were conducted at the University of Montpellier II, Service commun de Microscopie Electronique, on a JSM-6300 F. SEM samples were deposited on carbon coated support and platin shadowed. X-ray diffraction: samples were prepared by placing a small amount of microspheres in a sealed quartz capillary (diameter 1 mm), and then placing the capillary in a sample holder. SAXS measurements were conducted at the University of Montpellier II, Laboratoire GDPC on a diffraction system equipped with a two-dimensional position-sensitive area detector. The sample to-detector distance was 30 cm, source: “Rigaku” Copper rotating anode working at 40 KV, 100 mA, monochromator confocal Max Flux Osmic optic. Diffraction patterns were obtained using an image plate 2 D detector. The low angle reflections were in accordance with Bragg’s law  $2d \sin\theta = h\lambda$ , where  $\lambda$  is the wavelength (1.54Å),  $d$  is the repeat period,  $h$  is the number of the diffraction order, and  $\theta$  is the Bragg angle. Conductivities measurements were carried out with a Mettler Toledo MC 226 conductivity meter. The solid-state <sup>31</sup>P MAS NMR spectra were obtained on a Bruker Avance-400 MHz NMR spectrometer (magnetic field 9.4T) operating at a <sup>31</sup>P resonance frequency of 162.1 MHz and using a commercial Bruker 2.5 mm double-bearing probe. About 12 mg of samples were placed in a zirconium dioxide rotors of 2.5-mm outer diameter and spin at a Magic Angle Spinning rate of 20 kHz. The experiments were performed at room temperature, 256 scans were accumulated using a delay of 10 s. The <sup>31</sup>P chemical shifts were referenced to 85% aqueous phosphoric acid (H<sub>3</sub>PO<sub>4</sub>).

**General procedure for microspheres preparation:**

To prepare hybrides microspheres, 25 mg of freeze dried DSUPC are hydrated 2 minutes at 75 °C by 500  $\mu$ l of a 0.16 M aqueous solution of Thorium IV nitrate (or Cerium III nitrate), at their natural acidic pH. The precipitate is washed twice with 200  $\mu$ l of deionized water and then freeze dried.

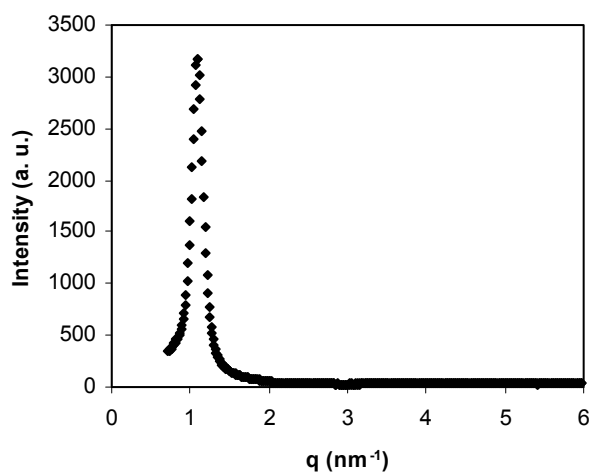

**Figure 1.** SAXS profile of DSUPC-Thorium based microspheres.

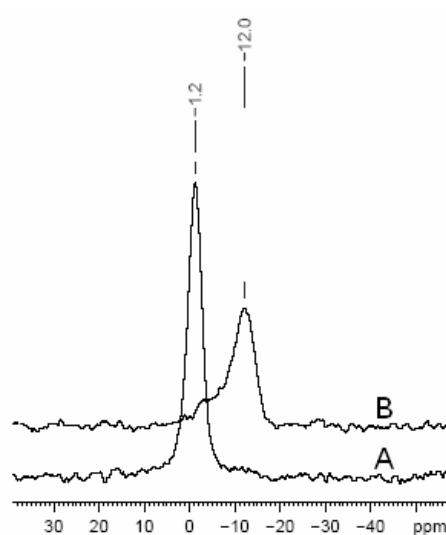

**Figure 2.** <sup>31</sup>P HRMAS NMR spectra of (A) DSUPC and (B) DSUPC-Thorium based microspheres.

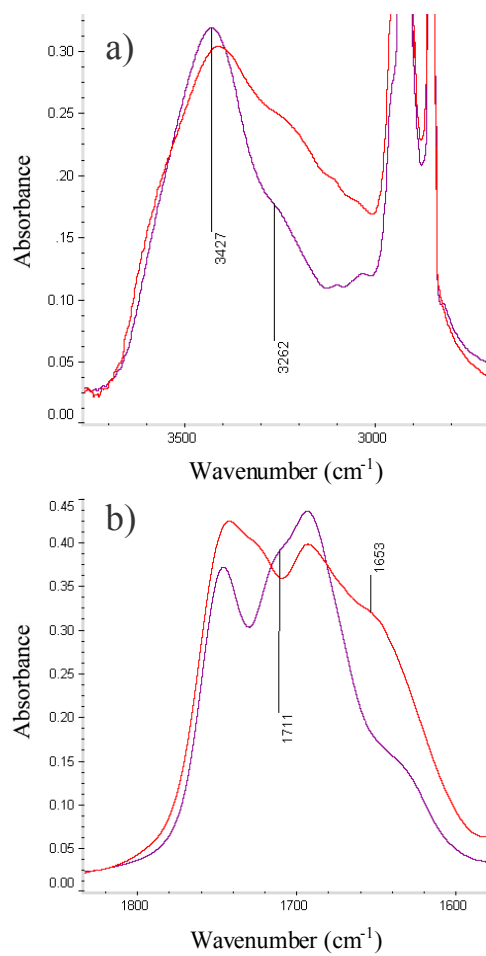

**Figure 3.** FTIR spectra of DSUPC (Blue line) and DSUPC-Thorium based microspheres (Red line).

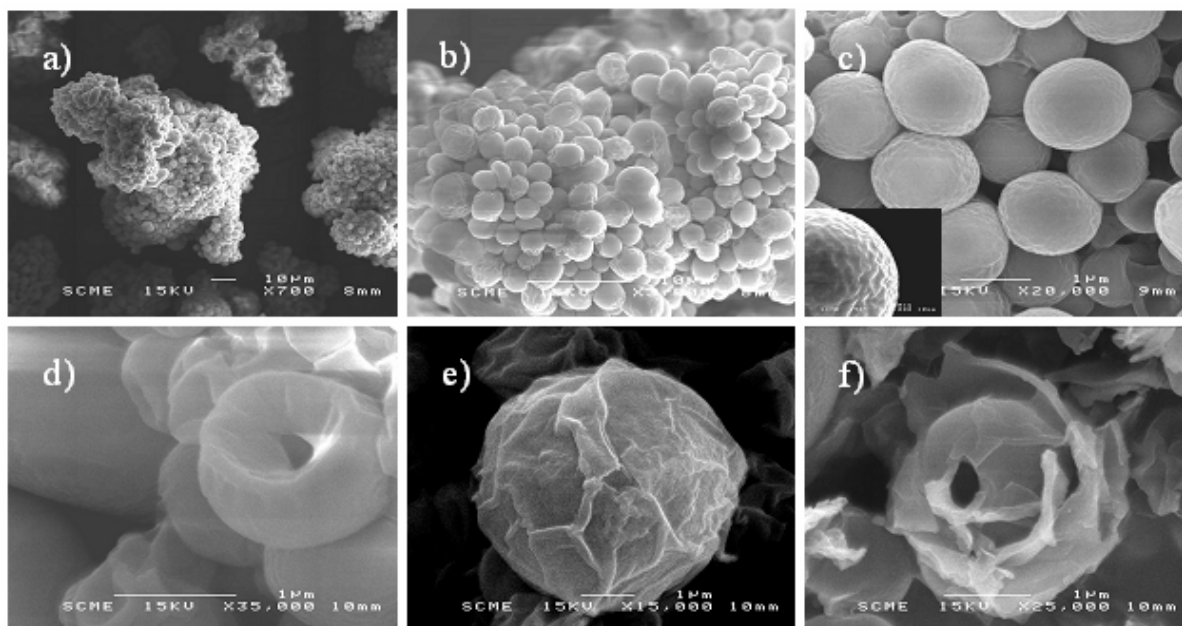

**Figure 4.** Typical SEM images of thorium (a), (b), (c), and Cerium (e) microspheres at different magnification. Inset (c): magnification of a thorium microsphere surface. (d) and (f) are images of respectively thorium and cerium destroyed microspheres showing their hollow structure.

### Conductivity measurements

The composition of the shells was determined as following: In a typical experiment (realized in triplicate), 25.0 mg of DSUPC ( $2.65 \times 10^{-5}$  moles) are hydrated at 75 °C by 500  $\mu$ L of a thorium IV nitrate solution ( $8.00 \times 10^{-5}$  moles). After 2 minutes the precipitate obtained is vigorously triturated. The volume of the suspension is extended to 10 mL with milli Q water and an average conductance of  $G = 2.80$  mS/cm is measured at 300 °K. This value gives a concentration of  $6.80 \times 10^{-3}$  M ( $6.80 \times 10^{-5}$  moles). The amount of thorium nitrate incorporated in the microsphere shells corresponds to the difference of soluble thorium nitrate before and after the formation of microspheres;  $8.00 \times 10^{-5} - 6.80 \times 10^{-5} = 1.20 \times 10^{-5}$  moles. The ratio  $R = \text{Th}^{4+}/\text{DSUPC}$  in the shells is  $R = 1.20 \times 10^{-5}/2.65 \times 10^{-5} = 0.45$ .

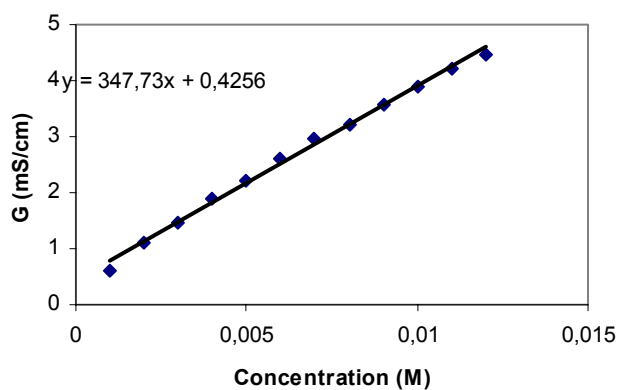

**Figure 5.** Standard curve of thorium IV nitrate in milli Q water conductance G at 22 °C versus concentration C.

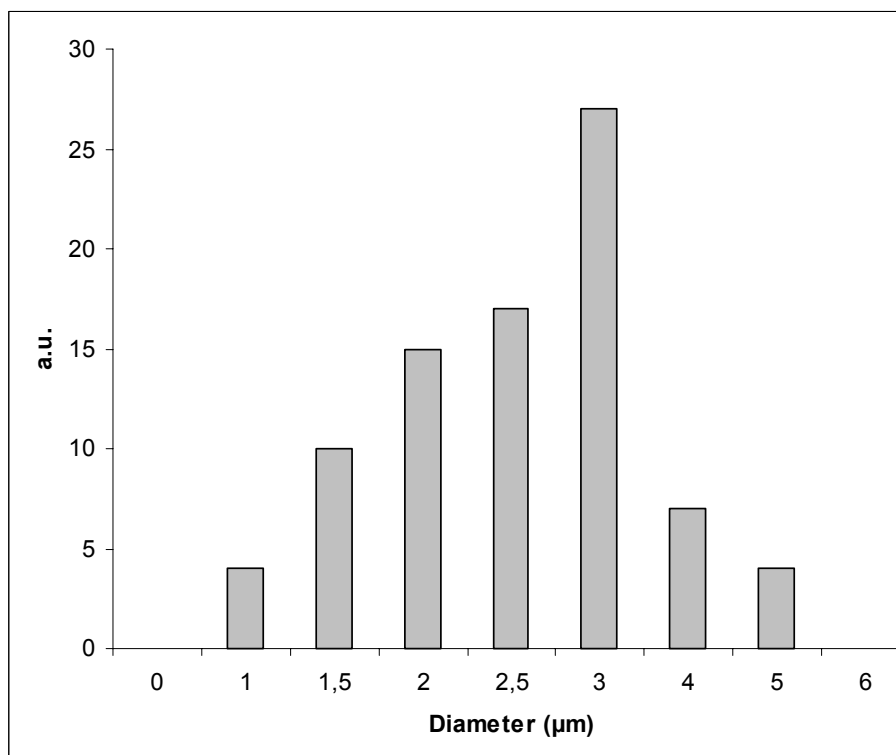

**Figure 6.** Size distribution of the microspheres (objects versus size) obtained from the electron microscopic images (SEM).
